# Supplementary material
Source: PubMed Central journal article supplement (PMC9802556)
Supplement: KID.0005882022-s0001.pdf [file KID.0005882022-s0001.pdf]

## Supplemental data

Supplemental Table 1: Other diagnoses.

| <b>Biopsy Diagnosis</b>                         | <b>No. of biopsies</b> |
|-------------------------------------------------|------------------------|
| Other (non-diagnostic/normal/descriptive/tumor) | 277                    |
| Thrombotic Microangiopathy                      | 97                     |
| Minimal Change Disease                          | 96                     |
| Post-infectious GN                              | 90                     |
| Tubulointerstitial Nephropathy and Fibrosis     | 74                     |
| Chronic Interstitial Nephritis                  | 59                     |
| Oxalate Nephropathy                             | 34                     |
| Fibrillary Glomerulonephritis                   | 34                     |
| Cast Nephropathy                                | 33                     |
| Cryoglobulinemic Glomerulonephritis             | 30                     |
| Genetic Kidney Disease                          | 27                     |
| MPGN pattern                                    | 22                     |
| C3 Glomerulopathy                               | 19                     |
| Anti-GBM nephritis                              | 19                     |
| Arteriosclerosis                                | 19                     |
| PGNMID                                          | 18                     |
| C1q Nephropathy                                 | 12                     |
| Light Chain Proximal Tubulopathy                | 10                     |
| Immunotactoid GN                                | 8                      |
| MIDD                                            | 2                      |

**Supplemental Table 2 –Patient location other than Ohio and Florida.**

| <b>Location</b>      | <b>Number of Patients</b> |
|----------------------|---------------------------|
| Pennsylvania         | 91                        |
| New York State       | 45                        |
| West Virginia        | 48                        |
| Michigan             | 34                        |
| Indiana              | 32                        |
| Caribbean            | 28                        |
| Kentucky             | 28                        |
| Middle East          | 20                        |
| Georgia              | 12                        |
| Texas                | 10                        |
| Maryland             | 7                         |
| South America        | 7                         |
| Virginia             | 6                         |
| Tennessee            | 6                         |
| Asia                 | 5                         |
| California           | 5                         |
| Illinois             | 5                         |
| North Carolina       | 5                         |
| N/A                  | 5                         |
| Oklahoma             | 4                         |
| South Carolina       | 4                         |
| Arkansas             | 3                         |
| Arizona              | 3                         |
| Central America      | 3                         |
| Louisiana            | 3                         |
| Wisconsin            | 3                         |
| Alaska               | 2                         |
| Alabama              | 2                         |
| Connecticut          | 2                         |
| Massachusetts        | 2                         |
| Maine                | 2                         |
| Africa               | 1                         |
| Australia            | 1                         |
| District of Columbia | 1                         |
| Iowa                 | 1                         |
| Minnesota            | 1                         |
| Missouri             | 1                         |
| Mississippi          | 1                         |
| Montana              | 1                         |

|                |   |
|----------------|---|
| New Hampshire  | 1 |
| New Jersey     | 1 |
| New Mexico     | 1 |
| Nevada         | 1 |
| United Kingdom | 1 |
